# Supplementary material for: Phospho-ablation of cardiac sodium channel Nav1.5 mitigates susceptibility to atrial fibrillation and improves glucose homeostasis under conditions of diet-induced obesity
Source: PubMed Central journal article supplement (PMC8005377; doi:10.1038/s41366-021-00742-4), 2021-01-26

**Supplementary Figure 1. Six weeks of high-fat diet upregulates CaMKII and Nav1.5 phosphorylation in WT-HFD mice.** Representative immunoblots and densitometry showing (A) phosphorylated Nav<sub>v</sub>1.5 at S571 (pNav1.5) relative to total Nav<sub>v</sub>1.5 and (B) phosphorylated CaMKII at T286/287 (pCaMKII) relative to total CaMKII after 6 weeks of HFD. Data represented as means ± SEM (WT-chow n=4, WT-HFD n=9, SA-HFD n=4; \*p<0.05 vs WT-HFD)

**Supplementary Figure 2. SA mice have reduced weight, food intake and improved glucose tolerance compared to WT mice on a chow diet.** (A) Body weight of WT and SA mice on a chow diet. Data are presented as means ± SEM (WT Chow n=22, SA-chow n=11; \*\*\*\*p<0.0001 vs WT chow). (B) Average daily food intake of WT and SA mice on a chow diet. Data are presented as means ± SEM (WT chow n=3, SA chow n=3; \*\*p<0.01 vs WT chow) (C) Glucose tolerance test excursion curve and (D) glucose tolerance test area under curve. Data are presented as means ± SEM (n=5/group; \*p<0.05 vs WT chow). (E) Glucose tolerance test excursion curve and (F) glucose tolerance test area under curve. Data are presented as means ± SEM (n=5/group; \*p<0.05, \*\*p<0.01 vs WT chow) (G) Insulin tolerance test excursion curve and (H) insulin tolerance test area under curve. Data are presented as means ± SEM (n=5/group; \*\*p<0.01 vs WT chow). (I) Pyruvate tolerance test excursion curve and (J) pyruvate tolerance test area under curve after 6 weeks of HFD. Data are presented as means ± SEM (WT-HFD n=5, SA-HFD n=9; \*p<0.05, \*\*p<0.01, \*\*\*\*p<0.0001 vs WT-HFD)

**Supplementary Figure 3. Six weeks of high-fat diet causes changes in glucose tolerance and body composition of both WT-HFD and SA-HFD mice.** (A) Glucose

tolerance test excursion curve. Data are presented as means  $\pm$  SEM (WT chow n=10, WT-HFD n=25, SA-HFD n=12; \*p<0.05, \*\*p<0.01, \*\*\*p<0.001, \*\*\*\*p<0.0001 for WT chow vs. WT-HFD; \$p<0.05, \$\$p<0.01, \$\$\$p<0.001, \*\*\*\*p<0.0001). **(B)** Glucose tolerance test area under curve. Data are presented as means  $\pm$  SEM (WT chow n=10, WT-HFD n=25, SA-HFD n=12; \*\*\*p<0.001 vs. WT-HFD. Changes in **(C)** total fat mass, **(D)** percent fat mass, **(E)** total lean mass and **(F)** percent lean mass after 6 weeks of chow diet or HFD were measured using EchoMRI. Data are presented as means  $\pm$  SEM (WT-Chow n=10, WT-HFD n=20, SA-HFD n=12; \*\*p<0.01, \*\*\*\*p<0.0001 vs WT-HFD).

**Supplementary Figure 4. Expression of genes related to mitochondrial metabolism, fatty acid oxidation and glucose metabolism in various tissues in SA-HFD mice.** Gene expression analysis for **Liver (A)** Mitochondrial metabolism **(B)** Fatty acid oxidation **(C)** Glucose metabolism, **TA (D)** Mitochondrial metabolism **(E)** Fatty acid oxidation **(F)** Glucose metabolism, **iBAT (G)** Mitochondrial metabolism **(H)** Fatty acid oxidation **(I)** Glucose metabolism, **ingWAT (J)** Mitochondrial metabolism **(K)** Fatty acid oxidation **(L)** Glucose metabolism and **small intestine (M)** Mitochondrial metabolism **(N)** Fatty acid oxidation **(O)** Glucose metabolism. Data are presented as means  $\pm$  SEM (n=5/group; \*p<0.05, \*\*p<0.01, \*\*\*p<0.001, \*\*\*\*p<0.0001 vs WT-HFD)

**Supplementary Figure 5. Pair-feeding of WT mice (WT-HFD-PF) to SA-HFD mice over 6 weeks of HFD (A)** Schematic description of pair-feeding WT-HFD-PF mice the amount of food consumed by SA-HFD mice over 6 weeks of diet. **(B)** Daily food intake and **(C)** average food intake for all WT-HFD-PF mice was measured. **(D)** Changes in total fat mass and **(E)** total lean mass were measured using EchoMRI. Data are represented as Mean  $\pm$  SEM (WT-HFD-PF n=9, SA-HFD n=10; \*\*p<0.01 vs WT-HFD-

PF) **(F)** Masson's Trichrome staining of left atrial sections to indicate fibrosis (blue) levels relative to normal cardiac tissue (red) (Scale bar 200  $\mu$ m) and **(G)** Percentage of fibrotic tissue normalized to WT. Data are presented as means  $\pm$  SEM (SA-HFD n=3; WT-HFD-PF n=5; \*p<0.05). **(H)** Insulin tolerance and **(I)** area under curve for insulin tolerance was measured by injecting insulin 1 unit per kg body weight i.p. Data are represented as Mean  $\pm$  SEM (WT-HFD-PF n=9, SA-HFD n=10; \*\*p<0.01 vs WT-HFD-PF).

**Supplementary Table 1: qPCR forward and reverse primer sequences for the genes measured, related to Supplemental Figure 4.**

| Gene  | Forward Primer Sequence | Reverse Primer Sequence    |
|-------|-------------------------|----------------------------|
| Acs1  | ACACTTCCTTGAAGCGATGG    | GGCTCGACTGTATCTTGTGG       |
| Acs13 | GGCCAACGTGGAAAAGAAAG    | GTCTTGGAATCCTTCTCGCC       |
| Acs14 | GCACCTTCGACTCAGATCAC    | CCAGGTTTGTCTGAAGTGGG       |
| Acs15 | CGCCCCATCTCCACTCCAG     | GCTTCAAACACCCAACATCCCATTGC |
| Aldoa | GCGACCACCATGTCTATCTG    | GAAAGTGACCCCAGTGACAG       |
| Aldoa | GCGACCACCATGTCTATCTG    | GAAAGTGACCCCAGTGACAG       |
| Cd36  | TGGAGCTGTTATTGGTGACAG   | TGGGTTTTGCACATCAAAGA       |
| Cd36  | TGGAGCTGTTATTGGTGACAG   | TGGGTTTTGCACATCAAAGA       |
| Cidea | GGTGGACACAGAGGAGTTCTTTC | CGAAGGTGACTCTGGCTATTCC     |
| Cidea | GGTGGACACAGAGGAGTTCTTTC | CGAAGGTGACTCTGGCTATTCC     |

|        |                             |                            |
|--------|-----------------------------|----------------------------|
| Cpt1   | AAAGATCAATCGGACCCTAGACA     | CAG CGA GTA GCG CAT AGT CA |
| Cpt1a  | AAAGATCAATCGGACCCTAGACA     | CAG CGA GTA GCG CAT AGT CA |
| Cs     | GACTACATCTGGAACACACTCAATTCA | CGAGGGTCAGTCTTCCTCAGTAC    |
| Cs     | GACTACATCTGGAACACACTCAATTCA | CGAGGGTCAGTCTTCCTCAGTAC    |
| Elov13 | GTGCTTTGCCATCTACACGGATG     | ATGAGTGGACGCTTACGCAGGA     |
| Elov13 | GTGCTTTGCCATCTACACGGATG     | ATGAGTGGACGCTTACGCAGGA     |
| Eno1   | CTTGCTTTGCAGCGATCCTA        | GAAGAGACCTTTTGCGGTGT       |
| Eno1   | CTTGCTTTGCAGCGATCCTA        | GAAGAGACCTTTTGCGGTGT       |
| Eno3   | CTGTGCCTGCCTTTAATGTG        | CTTCCCATACTTGGCCTTGA       |
| Eno3   | CTGTGCCTGCCTTTAATGTG        | CTTCCCATACTTGGCCTTGA       |
| Fabp3  | AGAGTTGACGAGGTGACAGCA       | TTGTCTCCTGCCCGTTCCACTT     |
| Fabp3  | AGAGTTGACGAGGTGACAGCA       | TTGTCTCCTGCCCGTTCCACTT     |
| Fabp5  | GACGACTGTGTTCTCTTGTAACC     | TGTTATCGTGCTCTCCTTCCCG     |
| Fabp5  | GACGACTGTGTTCTCTTGTAACC     | TGTTATCGTGCTCTCCTTCCCG     |
| Fatp1  | TGCCACAGATCGGCGAGTTCTA      | AGTGGCTCCATCGTGTCCTCAT     |
| Fatp4  | GACTTCTCCAGCCGTTTCCACA      | CAAAGGACAGGATGCGGCTATTG    |
| Fbp1   | TGCTGAAGTCGTCCTACGCTAC      | TTCCGATGGACACAAGGCAGTC     |
| Ffar4  | GTGACTTTGAACTTCCTGGTGCC     | CAGAGTATGCCAAGCTCAGCGT     |
| Ffar4  | GTGACTTTGAACTTCCTGGTGCC     | CAGAGTATGCCAAGCTCAGCGT     |
| G6Pc   | AGGTCGTGGCTGGAGTCTTGTC      | GTAGCAGGTAGAATCCAAGCGC     |

|       |                         |                          |
|-------|-------------------------|--------------------------|
| Gapdh | AACTTTGGCATTGTGGAAGG    | ACACATTGGGGGTAGGAACA     |
| Glut4 | ATCATCCGGAACCTGGAGG     | CGGTCAGGCGCTTTAGACTC     |
| Glut4 | ATCATCCGGAACCTGGAGG     | CGGTCAGGCGCTTTAGACTC     |
| Gpd1  | CTCATCACGACCTGCTATGG    | CTGCTCAATGGACTTTCCAG     |
| Gpd2  | GCGGACTCATCACAATAGCA    | TGAAGGAACAGCCCAACAG      |
| Gpi1  | ATGGGCATATTCTGGTGGAC    | CCCGATTCTCGGTGTAGTTG     |
| Gpi1  | ATGGGCATATTCTGGTGGAC    | CCCGATTCTCGGTGTAGTTG     |
| Gyk   | CAAATGCAAGCAGGACGATG    | GGCCCCAGCTTTCATTAGG      |
| Hk2   | AGAGAACAAGGGCGAGGAG     | GGAAGCGGACATCACAATC      |
| Hk2   | AGAGAACAAGGGCGAGGAG     | GGAAGCGGACATCACAATC      |
| Idh3a | GCAGGACTGATTGGAGGTCTTG  | GCCATGTCCTTGCCTGCAATGT   |
| Lipe  | TGGCACACCATTTTGACCTG    | TTGCGGTTAGAAGCCACATAG    |
| Lpl   | GATGCCCTACAAAGTGTTCCA   | AAATCTCGAAGGCCTGGTTG     |
| Mdh2  | TCACTCCTGCTGAAGAACAGCC  | CCTTTGAGGCAATCTGGCAACTG  |
| Nrf1  | CAACAGGGAAGAAACGGAAA    | GCACCACATTCTCCAAAGGT     |
| Nrf1  | CAACAGGGAAGAAACGGAAA    | GCACCACATTCTCCAAAGGT     |
| Nrf2  | AGGTTGCCACATTCCCAAACAAG | TTGCTCCATGTCCTGCTCTATGCT |
| Nrf2  | AGGTTGCCACATTCCCAAACAAG | TTGCTCCATGTCCTGCTCTATGCT |
| Ogdh  | GGTGTCGTCAATCAGCCTGAGT  | ATCCAGCCAGTGCTTGATGTGC   |
| Pcx   | GGATGACCTCACAGCCAAGCAT  | GCAATCGAAGGCTGCGTACAGT   |

|       |                         |                         |
|-------|-------------------------|-------------------------|
| Pdha1 | GTGAGAACAACCGCTATGGCATG | CGCAAACCTTTGTTGCCTCTCGG |
| Pfkl  | CCATCAGCAACAATGTGCCTGG  | TGAGGCTGACTGCTTGATGCGA  |
| Pfkl  | CCATCAGCAACAATGTGCCTGG  | TGAGGCTGACTGCTTGATGCGA  |
| Pfkm  | CTGGTGCTGAGGAATGAGAA    | TTCCTGTCAAAGGGAGTTGG    |
| Pfkm  | CTGGTGCTGAGGAATGAGAA    | TTCCTGTCAAAGGGAGTTGG    |
| Pfkp  | AAGCTATCGGTGTCCTGACC    | TCCCACCCACTTGCAGAAT     |
| Pfkp  | AAGCTATCGGTGTCCTGACC    | TCCCACCCACTTGCAGAAT     |
| Pgam1 | GACGATCTTATGATGTCCCACC  | GTACCTGCGATCCTTGCTGA    |
| Pgam1 | GACGATCTTATGATGTCCCACC  | GTACCTGCGATCCTTGCTGA    |
| Pgam2 | CTGCCTACCTGTGAAAGTCTC   | GACATCCCTTCCAGATGTTT    |
| Pgam2 | CTGCCTACCTGTGAAAGTCTC   | GACATCCCTTCCAGATGTTT    |
| Pgc1a | GAATCAAGCCACTACAGACACCG | CATCCCTCTTGAGCCTTTCGTG  |
| Pgc1a | GAATCAAGCCACTACAGACACCG | CATCCCTCTTGAGCCTTTCGTG  |
| Pgc1b | TCCTGTAAAAGCCCGGAGTAT   | GCTCTGGTAGGGGCAGTGA     |
| Pgc1b | TCCTGTAAAAGCCCGGAGTAT   | GCTCTGGTAGGGGCAGTGA     |
| Pgk1  | GAGCCTCACTGTCCAAACTA    | CTTTAGCGCCTCCCAAGATA    |
| Pgk1  | GAGCCTCACTGTCCAAACTA    | CTTTAGCGCCTCCCAAGATA    |
| Pklr  | CGAAAAGCCAGTGATGTGGTGG  | GATGCCATCGCTCACTTCTAGG  |
| Pkm   | CTGTGGAGATGCTGAAGGAG    | CAACAGGACGGTAGAGAATGG   |
| Pkm   | CTGTGGAGATGCTGAAGGAG    | CAACAGGACGGTAGAGAATGG   |

|        |                         |                        |
|--------|-------------------------|------------------------|
| Prdm16 | ATCCACAGCACGGGTGAAGCCAT | ACATCTGCCCACAGTCCTTGCA |
| Prdm16 | ATCCACAGCACGGGTGAAGCCAT | ACATCTGCCCACAGTCCTTGCA |
| Tfam   | GTCCATAGGCACCGTATTGC    | CCCATGCTGGAAAAACACTT   |
| Tfam   | GTCCATAGGCACCGTATTGC    | CCCATGCTGGAAAAACACTT   |
| Tpi1   | TATGGAGGTTCTGTGACTGGA   | CGGTGGGAGCAGTTACTAAA   |
| Tpi1   | TATGGAGGTTCTGTGACTGGA   | CGGTGGGAGCAGTTACTAAA   |
| Ucp1   | AGGCTTCCAGTACCATTAGGT   | CTGAGTGAGGCAAAGCTGATTT |
| Ucp1   | AGGCTTCCAGTACCATTAGGT   | CTGAGTGAGGCAAAGCTGATTT |

# Supplementary Figure 1

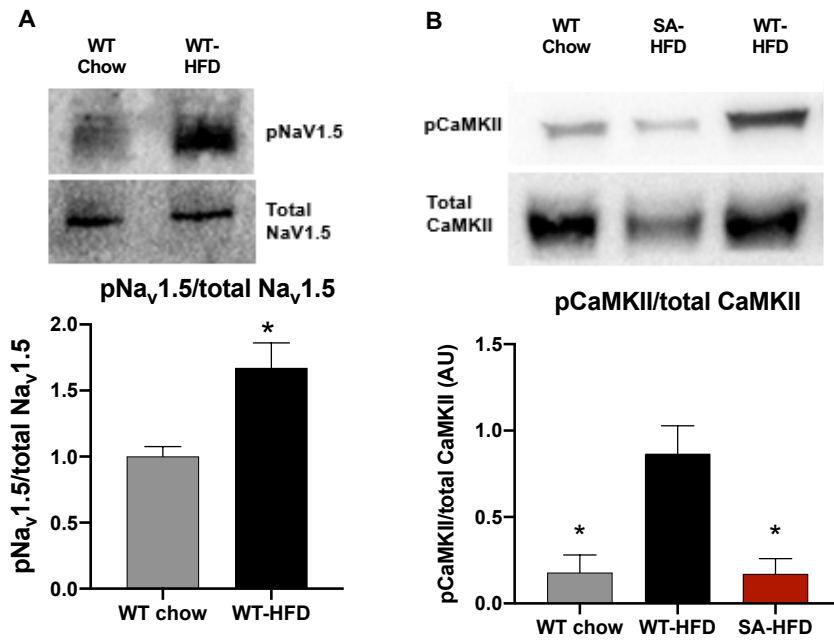



Supplementary Figure 2

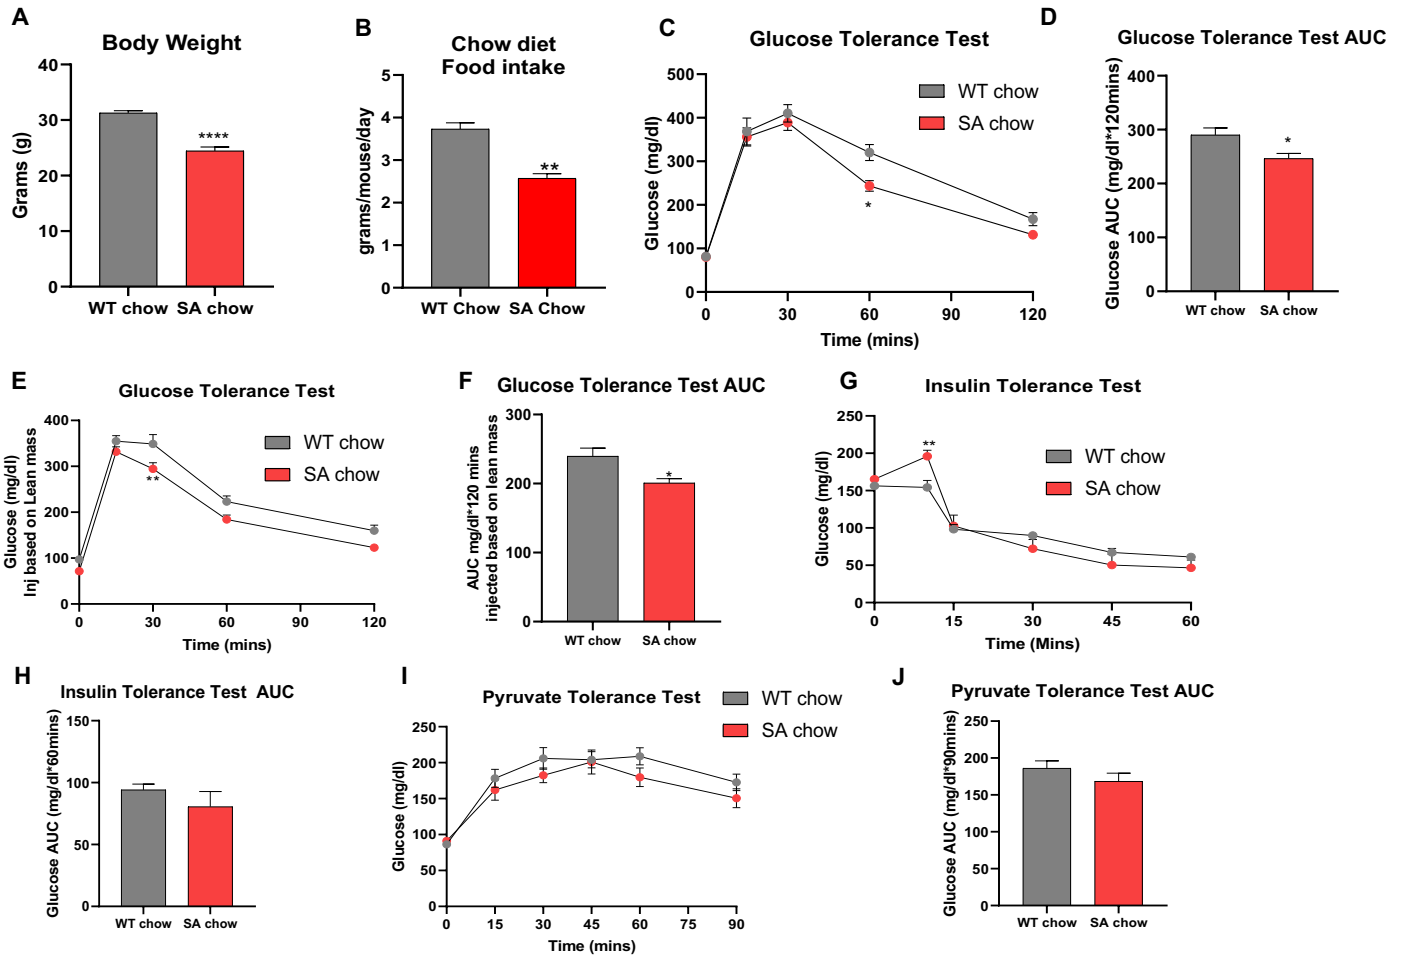

Supplementary Figure 3

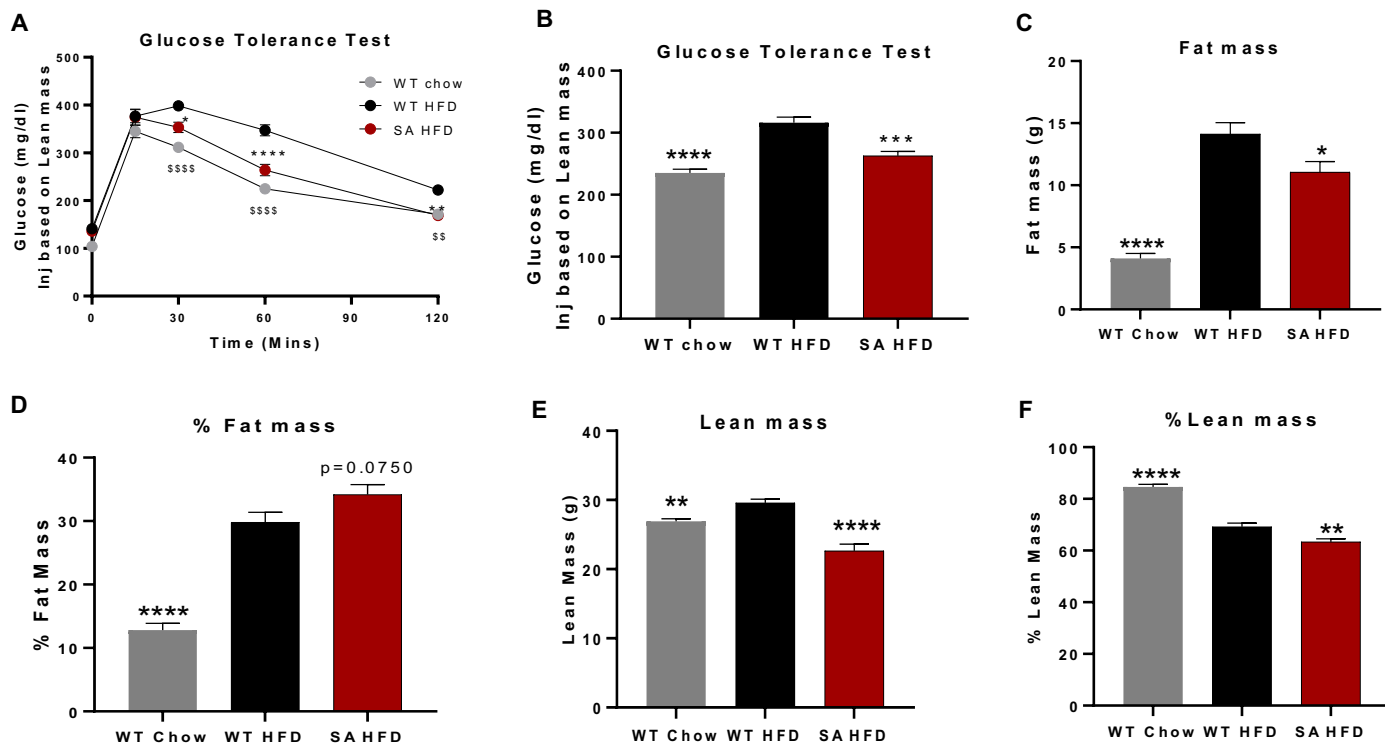

## Supplementary Figure 4

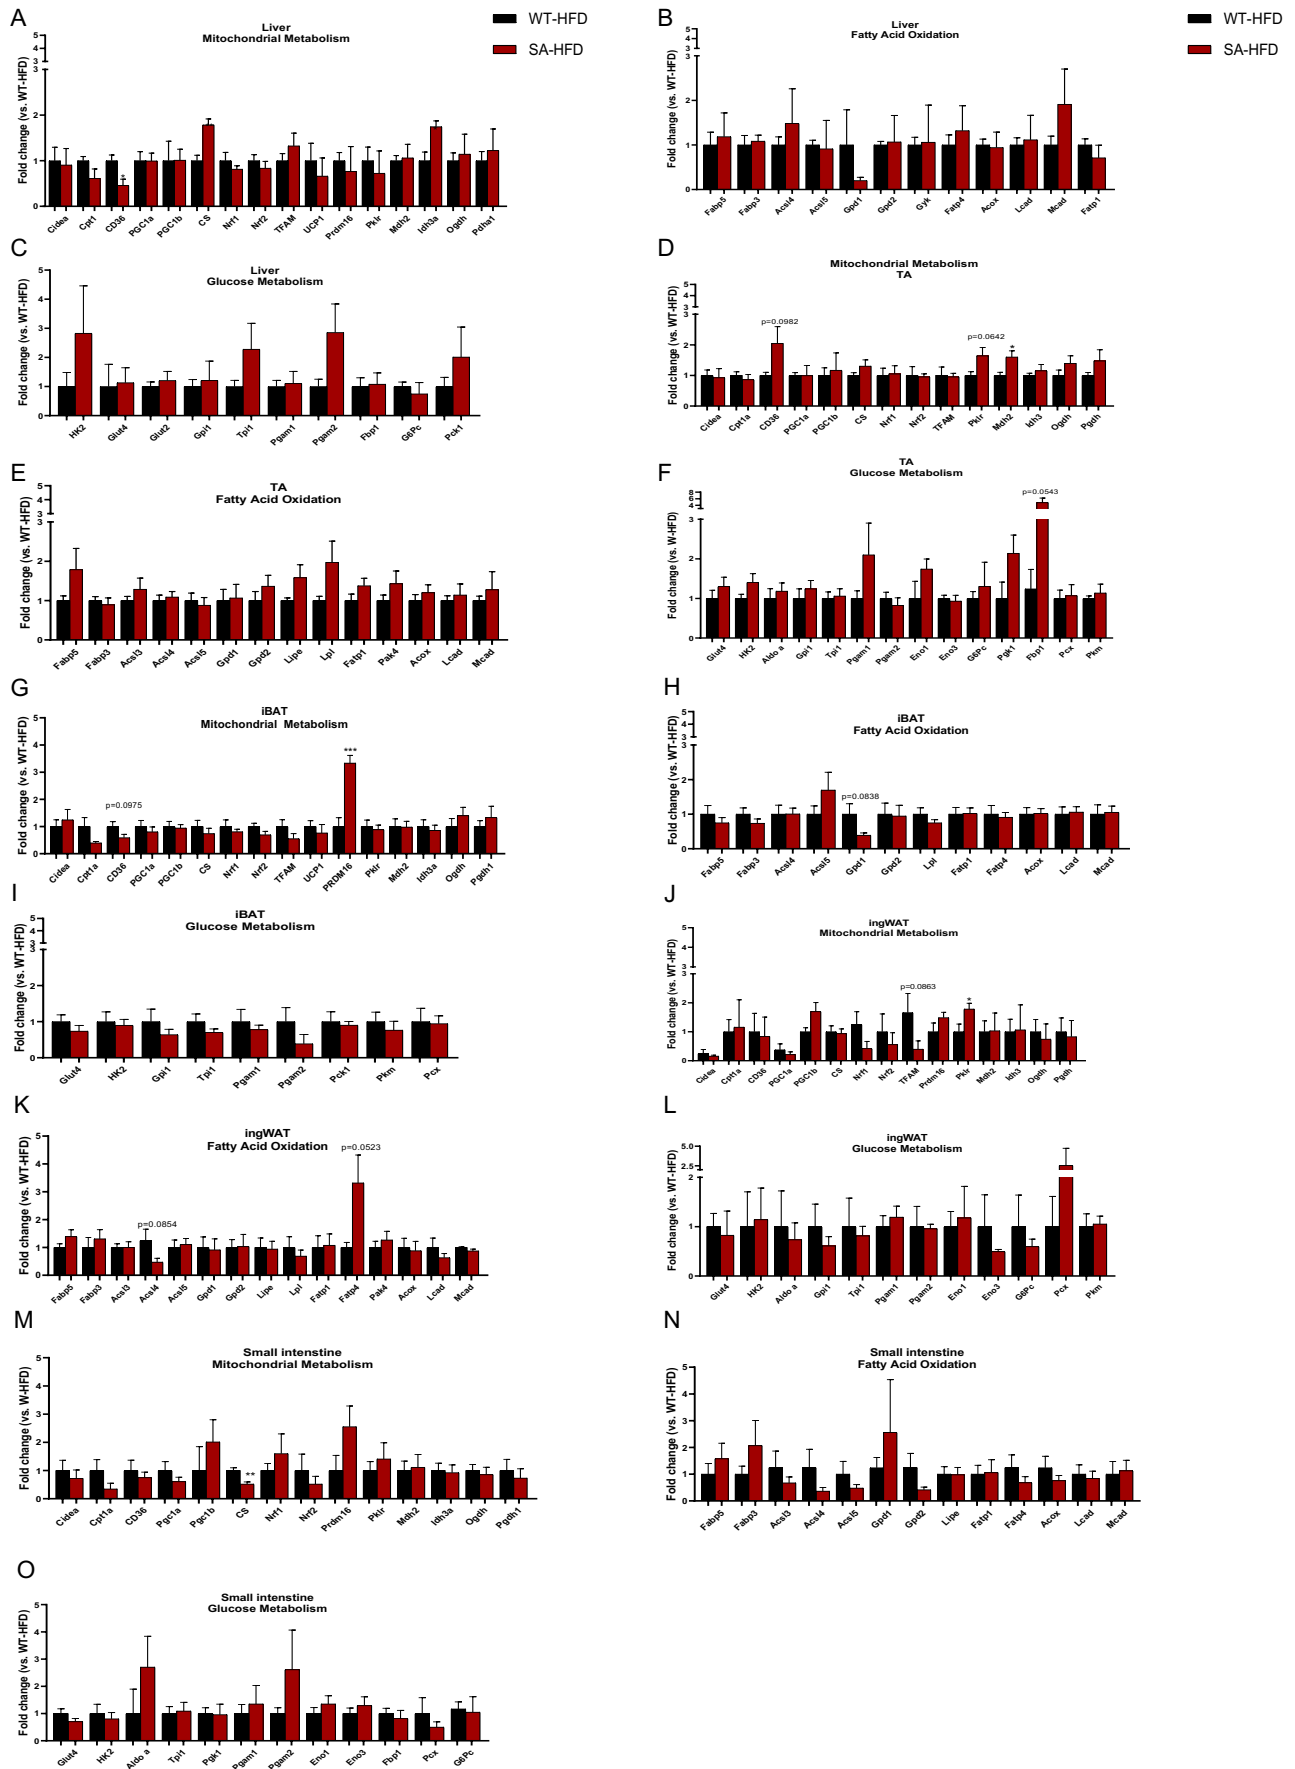

**Supplementary Figure 5**

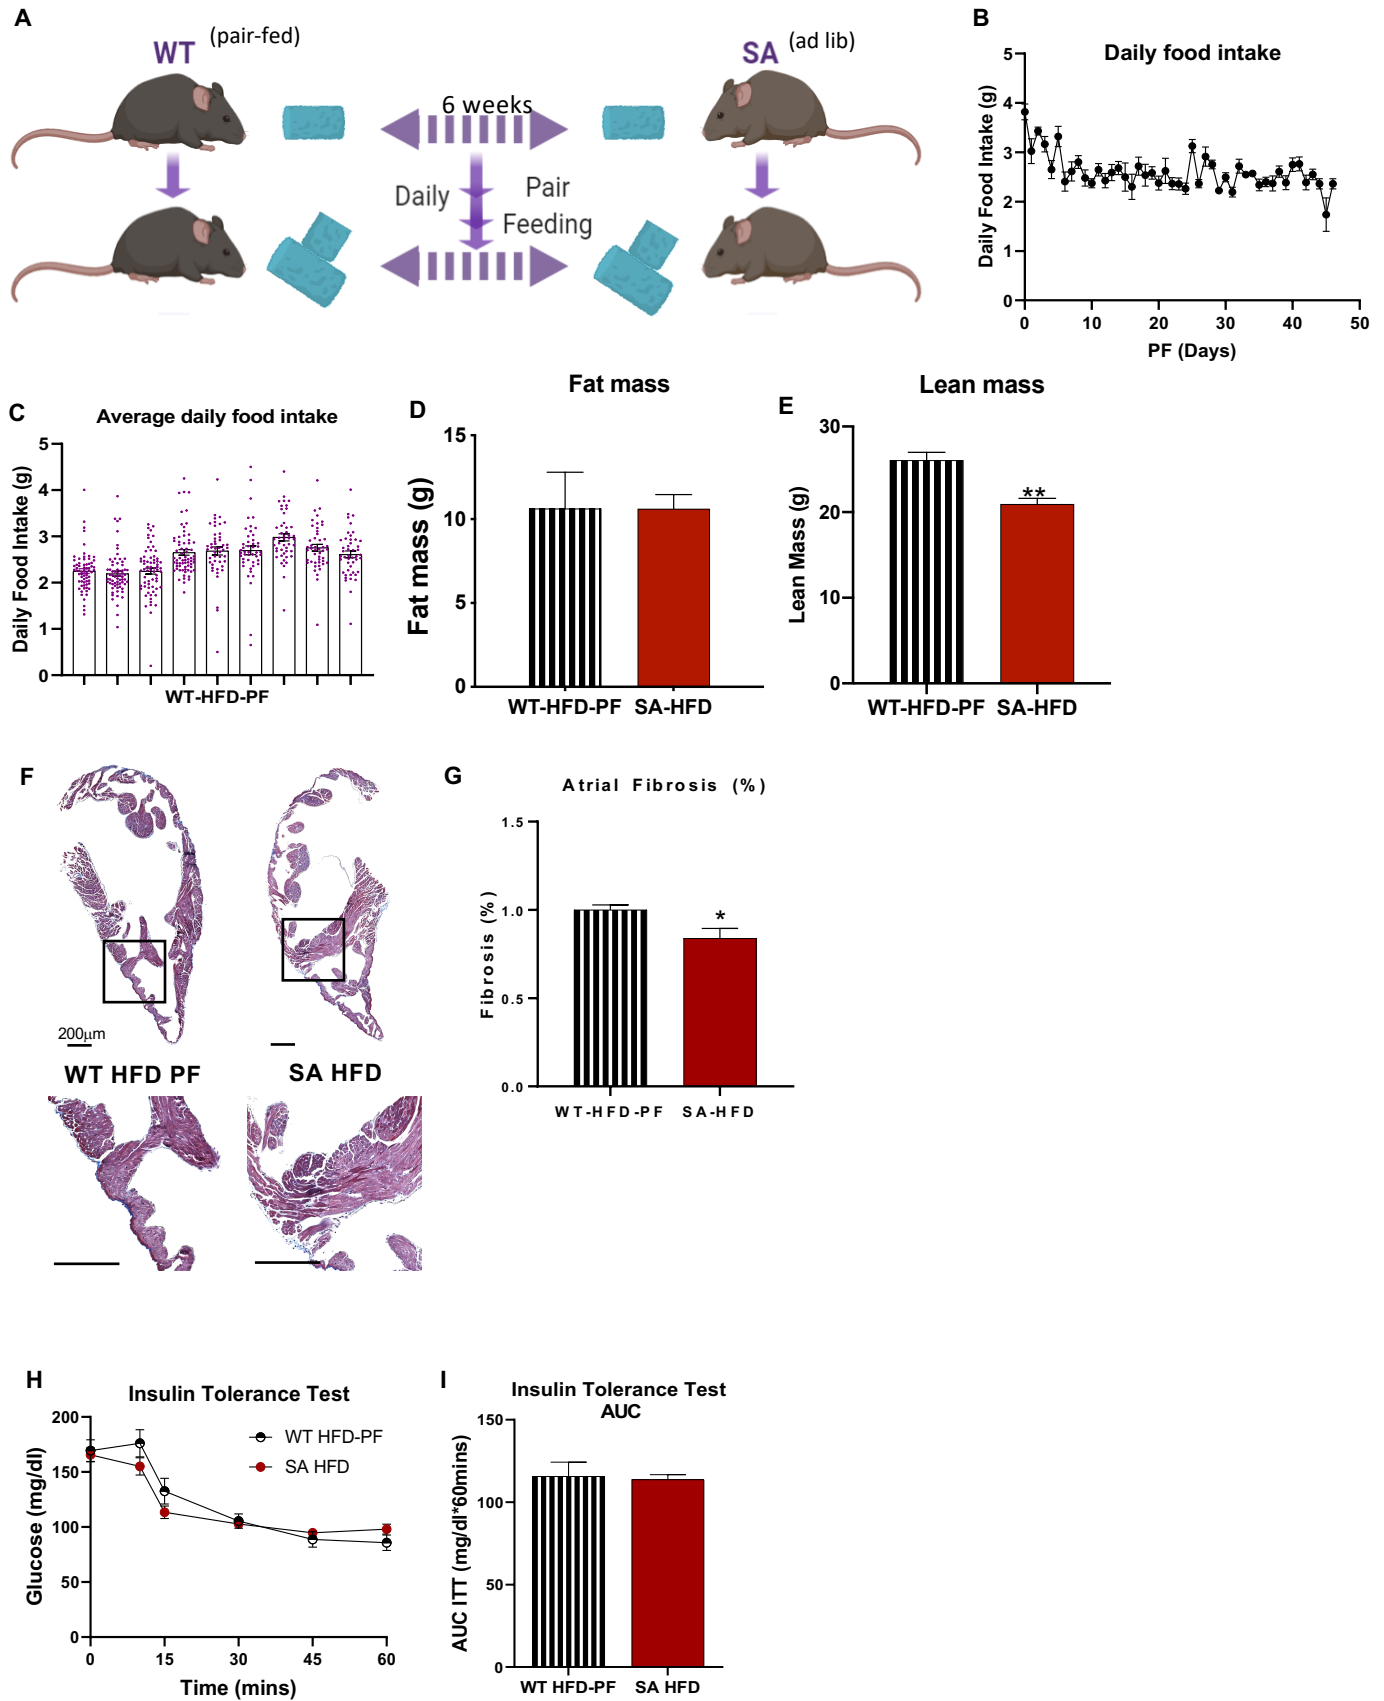

Supplement: 41366_2021_742_MOESM1_ESM.pdf [file 41366_2021_742_MOESM1_ESM.pdf]
